1 **Microfluidic delivery of cutting enzymes for fragmentation of surface-adsorbed**  
2 **DNA molecules**

3  
4  
5  
6  
7  
8  
9

6 **Julia Budassi<sup>1</sup>, NaHyun Cho<sup>1</sup>, Anthony Del Valle<sup>2</sup>, Jonathan Sokolov<sup>1\*</sup>**

10 <sup>1</sup>Department of Materials Science and Chemical Engineering, Stony Brook University, Stony  
11 Brook, New York, United States of America

12  
13 <sup>2</sup>Department of Physics and Astronomy, Stony Brook University, Stony Brook, New York,  
14 United States of America

15  
16

17 \*Corresponding author

18 E-mail: [jonathan.sokolov@stonybrook.edu](mailto:jonathan.sokolov@stonybrook.edu)

19  
20  
21  
22  
23  
24  
25  
26  
27  
28  
29  
30  
31  
32  
33  
34  
35  
36  
37  
38  
39  
40  
41  
42  
43  
44  
45  
46

## 47 **Abstract**

48 We describe a method for fragmenting, in-situ, surface-adsorbed and immobilized DNAs on  
49 polymethylmethacrylate(PMMA)-coated silicon substrates using microfluidic delivery of the  
50 cutting enzyme DNase I. Soft lithography is used to produce polydimethylsiloxane (PDMS)  
51 gratings which form microfluidic channels for delivery of the enzyme. Bovine serum albumin  
52 (BSA) is used to reduce DNase I adsorption to the walls of the microchannels and enable  
53 diffusion of the cutting enzyme to a distance of 10mm. Due to the DNAs being immobilized, the  
54 fragment order is maintained on the surface. Possible methods of preserving the order for  
55 application to sequencing are discussed.

56

57

## 58 **Introduction**

59

60 Significant progress in DNA sequencing has occurred over the last fifteen years, with  
61 dramatic improvement in throughput, in particular, as well as in haplotype phasing, read  
62 lengths and contig size [1-3]. Despite this, highly accurate and complete genome analysis at a  
63 reasonable cost and with rapid turnaround time such as would be desirable for personalized  
64 medicine has not yet been achieved. Short-read technologies (up to several hundreds of bases)  
65 are capable of generating Terabases of data but have difficulty in mapping structural variations  
66 and regions with long repeats. The ‘repeatome,’ comprising roughly half of the genome, has a  
67 role in gene expression and in disease and exhibits a relatively high rate of mutation [4].  
68 Synthetic long-read techniques grafted onto the short-read platforms have provided improvement  
69 over the original methods [5-10] and some longer-read platforms have also appeared [11-16].  
70 Nonetheless, no currently available technique is able to generate reads of a single DNA molecule  
71

72 greater than a few tens of kilobases. Since the range of human chromosome sizes is 47-249  
73 Mbp, there is still a need to assemble relatively small sequenced fragments into contigs and any  
74 simplification of the process can have a significant impact.

75 All current sequencing requires the fragmentation of long DNA molecules into kilobase-sized  
76 pieces or smaller for analysis. Long-range positional order is lost for the currently-used methods.  
77 The most widely-used techniques are fragmentation by mechanical means or enzymatic mean  
78 [17]. The mechanical techniques include sonication, hydrodynamic shearing through orifices  
79 (driven by centrifugation or use of a syringe pump), focused acoustic shearing (commercialized  
80 by Covaris, Woburn, MA) and nebulization (DNA suspended in a shearing buffer which is  
81 forced through an orifice by compressed air or nitrogen gas). The enzymatic fragmentation  
82 methods are based on nicking enzymes, restriction enzymes or various transposons (such as  
83 Illumina's Nextera system, which fragments and adds adapters in the same step, referred to as  
84 'tagmentation'). NEB has developed a product using a mixture of enzymes called 'Fragmentase'  
85 (New England Biolabs, Ipswich, MA). For all methods, to greater or lesser degree, there are  
86 issues of damage to the fragments and sequence bias of breaks in GC-rich vs. AT-rich regions  
87 [18].

88 It is clear that a method which preserves the sequential ordering of the fragments would be  
89 highly beneficial in simplifying the assembly problem. Two groups have published papers using  
90 localized cutting on surface-immobilized DNAs, one using atomic force microscopy to  
91 mechanically cut the molecules [19-21] while the second group used an electrochemical method  
92 to locally activate (with  $Mg^{+2}$  ions) enzymatic cutting [22]. This work, while highly interesting,  
93 involves cutting single (or very few) molecules at a time and is difficult to scale up. Our group  
94 has developed a method to use soft lithography stamps to allow cutting of significantly larger

95 numbers of surface-immobilized DNAs in parallel [23]. In that work, DNAs are deposited onto  
96 a substrate by withdrawing a polymethylmethacrylate (PMMA)-coated silicon wafer out of a  
97 DNA solution, a technique that has been termed ‘molecular combing [24-26]. This method and a  
98 technique developed for optical mapping on surfaces [27], have been used to deposit DNAs of up  
99 to megabase pair length on flat substrates [28]. The DNAs are stretched, aligned and  
100 immobilized along the direction of sample withdrawal at densities that depend on solution  
101 concentration, buffer pH [29-30] and surface type. A soft lithography stamp [31], in the form of  
102 a polydimethylsiloxane (PDMS) grating produced from a silicon master (see Fig 1), is ‘inked’

103

104 **Fig 1. Schematic of stamping method for fragmenting surface-adsorbed.** A PDMS stamp in  
105 the form of a grating is ‘inked’ with DNase I cutting enzyme and is brought into contact with a  
106 surface on which DNA molecules have been deposited.

107

108 with a DNase 1 solution and placed in contact with the surface containing the stretched and  
109 immobilized DNA molecules. The DNAs are cut at the contact points of the stamp, maintaining  
110 (on the surface) positional order. In that work [23], the DNAs were removed, en masse, by  
111 desorbing the DNA into buffer (NEBuffer 3.1, B7203S) at 75°C for 20 minutes or dissolving  
112 the substrate PMMA and purifying by phenol extraction. The fragments were end-repaired and  
113 sequenced using the PacBio platform (without amplification of the fragments in the case of  
114 desorption). Though the positional order was lost in those experiments, the cutting method was  
115 successfully demonstrated and some ideas for maintaining the order of the fragments were  
116 suggested.

117 However, the inking method for delivering the DNase 1 enzymes is rather difficult to  
118 implement and we have sought to develop a more controllable technique. In this paper, we report

119 on microfluidic delivery of the enzyme through micron-sized channels using soft lithography  
120 stamps. This technique is more reproducible and also lends itself to a variety of applications  
121 such as ordered removal of fragments or in-situ sequencing on the surface [32-33]. Another  
122 advantage of the method is that the application of the cutting enzyme is done from solution and  
123 so should have less steric hindrance than when applying by stamping.

124

## 125 **Materials and methods**

### 126 **Sample preparation**

127 Polished silicon wafers (Si(100), thickness 100-200 $\mu$ m thick, purchased from Wafer World,  
128 W. Palm Beach, FL) coated with PMMA layers, were used as  
129 substrates for DNA adsorption. The wafers were scribed and cleaved to make 1 cm x 2 cm  
130 samples. The wafers were cleaned using a modified Shiraki technique [34] as follows: (1) 10  
131 minutes sonication in ethanol, (2) rinse in deionized (DI) water, (3) 15 minutes in boiling  
132 solution of 3:1:1 ratio (by volume) of water: ammonium hydroxide (28-30%) : hydrogen  
133 peroxide (30%), (3) DI rinse, (4) 15 minutes in boiling solution of 3:1:1 ratio of water : sulfuric  
134 acid (98%) : hydrogen peroxide (30%), (5) DI rinse, (6) one minute in 9:1 solution of water :  
135 hydrofluoric acid (49%), (7) DI rinse. The resulting surfaces were hydrophobic.

136 A 15 mg/ml solution of PMMA (molecular weight 70K, Polymer Source, Inc., Canada) in  
137 toluene was spun-cast (PWM32 spinner, Headway Research, Inc., Garland, Texas) onto the  
138 silicon wafers at 2500 RPM for 30 seconds. The thickness of the resulting films was measured  
139 using an ellipsometer (Auto El, Rudolph Research, Hackettstown, NJ) and was typically 70 $\pm$ 8  
140 nm. Following spin-coating, the samples were annealed for 1-4 hours at 130 $^{\circ}$ C in an ion-pumped

141 vacuum chamber (pressure  $\leq 5 \times 10^{-7}$  Torr) to remove adsorbed ambient and any remaining  
142 solvent.

143 DNA solutions for adsorption were produced in two steps. First, 200 $\mu$ l of a 50ng/ $\mu$ l solution  
144 (using Lambda DNA, New England Biolabs (NEB) N3011S), containing 1.5 $\mu$ l of the fluorescent  
145 dye SyBr Gold (Invitrogen, S11494, Thermo Fisher Scientific, Waltham, MA) was prepared in a  
146 buffer. The buffer was either a 6-12:50 mixture (by volume) of 0.1M sodium hydroxide : 0.02M  
147 2-(n-morpholino) ethanesulfonic acid (MES) or 1X NEB DNase I reaction buffer (NEB B0303S,  
148 1X is 10mM Tris-HCl, 2.5mM MgCl<sub>2</sub>, 0.5mM CaCl<sub>2</sub>). This solution was heated for one hour at  
149 45°C to promote dye binding to the DNA. A further dilution in buffer by a factor of ten produced  
150 2000 $\mu$ l of working solution at a DNA concentration of 5 $\mu$ l/mg.

151 DNA was adsorbed to the substrates by the technique called dynamic molecular combing  
152 [26]. The DNA solution is placed in a teflon well and the sample, held vertically with teflon  
153 tweezers, was lowered into the well and incubated for 30 seconds. The sample was then  
154 withdrawn at a rate of 1-2mm/s using a computer-controlled stepping motor attached to a linear  
155 drive stage (see Fig 2). The DNA molecules, preferentially attached by their ends, are stretched  
156 linearly and immobilized on the surface as they are removed from the solution (see Fig 2).

157

158 **Fig 2. Apparatus for dip-coating ('combing') DNA molecules onto a substrate by**  
159 **withdrawal from solution.**

160

161

## 162 **Production of PDMS microfluidic channels**

163 The technique of soft lithography [31,35] was used to produce PDMS elastomer gratings.

164 Silicon masters were made at the fabrication facilities of the Center for Functional Nanomaterials

165 at Brookhaven National Laboratory. Firstly, a Cr/sodalime mask (aBeam Technologies,

166 Hayward, CA) was used to used to pattern a photoresist-coated Si wafer of diameter 4” by UV  
167 exposure using a Karl Suss MA6 Mask Aligner (Suss MicroTec SE, Garching, Germany). The  
168 photoresist layer spun-cast onto the silicon wafers, nominally 1.1 $\mu$ m thick, was a positive resist,  
169 Shipley S1811 (Shipley Co., Marlborough, MA, USA). UV exposure was 5-40 seconds,  
170 followed by 110°C bake for 30s. The photoresist pattern was developed for 20-50s using a 2:3  
171 mixture of MF-312 developer (Microposit, Rohm and Haas, Marlborough, MA) : water. Etching  
172 of the developed photoresist pattern to produce the silicon masters was done by reactive ion  
173 etching (RIE, Trion Phantom III RIETcher, Trion Technology, Clearwater, FL, USA). The gas  
174 mixture was 40:10 SF<sub>6</sub> : O<sub>2</sub> at a pressure of 100mTorr. Etching power was 100-150 W and  
175 etching time was 300-700s. Leftover photoresist was dissolved in acetone. Optical microscopy  
176 (Olympus BH2 BHT) and atomic force microscopy (AFM, Digital Nanoscope 3000) were used  
177 to characterize the silicon patterns. Fig 3A shows an AFM image and Fig 3B the cross-section of  
178 a typical sample. The depth of the channels in the grating pattern was typically 2-5 $\mu$ m.

179

180

181 **Fig 3, AFM image of silicon grating.**

182 (A) AFM topographical image of a silicon grating used as a master mold for making PDMS  
183 stamps. (B) Height cross-section along the white line in (A).

184

185

186 Soft lithography molds of PDMS were made using Sylgard 184 Silicone Elastomer (Dow

187 Corning, Midland, MI, USA). A 10:1 mixture of elastomer and curing agent (by weight) was

188 mixed thoroughly and trapped bubbles were removed by placing the mixture in a vacuum

189 desiccator for one hour. The degassed PDMS was poured over the silicon mold to a thickness of

190 approximately 5mm. The silicon mold was precoated with a thin film (less than 10nm) of

191 PMMA, spun-cast from a 3mg/ml solution (molecular weight 70K). The purpose of the

192 precoating was to reduce PDMS-silicon adhesion and facilitate removal of the PDMS layer. The  
193 PMMA-coated molds could be reused multiple times. The PMMA could also be removed with  
194 toluene and the wafers recoated for further use. The PDMS layers were cured at 60°C for 4 hours  
195 and then peeled off the molds. A typical cross-section of the grating, exposed by cutting the mold  
196 with a razor, is shown in the optical micrograph of Fig 4.

197

198 **Fig 4. Optical Micrograph of a cross-section of a PDMS grating.**

199

200

201

202 Microfluidic channels (approximately  $4.5 \pm 0.1 \mu\text{m} \times 3.7 \pm 0.3 \mu\text{m} \times 12 \pm 2 \text{ mm}$ , width by height  
203 by length, respectively) were made by placing the PDMS grating stamps in contact with the  
204 DNA-adsorbed substrates and tamping down the mold with tweezers to make good contact. An  
205 inlet/outlet hole of diameter 4mm had been previously cut through the PDMS layer using a  
206 biopsy punch (Integra, Miltex, Princeton, NJ USA)) and a liquid reservoir (also made from  
207 PDMS) with inner diameter of 6mm and height of 25mm was sealed to the stamp above the hole  
208 with PDMS (painted on and cured) (see Fig 5). The far end of the channels, away from the  
209 inlet/outlet, was sealed with PDMS, producing closed end channels. The cutting enzyme, here  
210 DNase I (NEB B0303S, Ipswich, MA USA), is delivered through the channels, as described  
211 below. The DNase I cuts the surface-immobilized DNAs along the channels while the PDMS  
212 stamp protects the DNA between the channels from being cut.

213

214 **Fig 5. End-on and side views of a PDMS grating appended fluid reservoir.**

215

216

217



## 218 **Results and discussion**

219 Preliminary to doing the patterned cutting of DNA, we prepared solutions at different  
220 concentrations of DNase I and placed 3 $\mu$ l drops onto PMMA-coated samples with adsorbed  
221 DNA. The samples were heated at 40°C for 20 minutes, with the drops covered by mineral oil  
222 (M5904, MilliporeSigma, Burlington, MA) to prevent evaporation. They were then imaged by  
223 fluorescence microscopy to determine an effective enzyme concentration for cutting. The stock  
224 DNase I solution of 2Units(U)/ $\mu$ l was diluted in DNase I Reaction Buffer to concentrations  
225 0.024U/ $\mu$ l, 0.048U/ $\mu$ l and 0.095U/ $\mu$ l (the recommended concentration for reactions in solution is  
226 given by the manufacturer as 0.02U/ $\mu$ l). Effective digestion was found for both of the higher  
227 concentrations, though somewhat more completely for the highest concentration. (see Fig 6). In  
228 further experiments, the concentration of 0.095U/ $\mu$ l was used unless noted otherwise. These  
229 results are consistent with the work of Gueroui et al [36], who observed digestion of combed  
230 DNA on a PMMA surface under similar conditions. (They also observed that for the restriction  
231 endonucleases HindIII and DraI the solution-level biochemical activity was not observed. We  
232 found the same result for PvuI.)

233

### 234 **Fig 6. Fluorescence image of SyBr Gold labeled DNA.**

235 Upper left area was covered with a solution containing 0.095U/ $\mu$ l of DNase I in NEB DNase I  
236 Reaction Buffer and shows effective digestion of DNA in that region.

237

238

239 For the first set of cutting experiments, a PDMS stamp placed in contact with a DNA sample  
240 had its reservoir filled up with 300 $\mu$ l of the DNase I solution. To fill the long, narrow  
241 microfluidic channels (micron-sized cross-section by mm lengths) with the solution can be done  
242 in a number of ways—using capillary action (the PDMS surface needs to be made hydrophilic),

243 applying vacuum at an open end away from the reservoir or applying pressure above the liquid in  
244 the reservoir, for example. We have used a convenient method [37], termed by the authors the  
245 ‘channel outgas technique.’ In this method, pressure is lowered above the reservoir (or the entire  
246 device is submerged in the filling liquid), causing air bubbles from the channels to escape  
247 through the liquid due to the buoyancy effect and allowing the channels to be filled with solution  
248 from the reservoir. The sample with stamp and reservoir was placed in a vacuum chamber (using  
249 an Edwards diaphragm pump having a teflon-coated diaphragm to enable pumping of high vapor  
250 pressure liquids) and the pressure was lowered to 20 Torr for 40 minutes. The sample, with  
251 channels now filled with the enzyme solution, was removed from the vacuum chamber and  
252 placed on a 40°C hotplate for 90 minutes to effect DNA digestion in the channels. The result was  
253 that digestion only occurred close to inlet of the reservoir, to a distance of less than 0.1mm. This  
254 raised a concern that perhaps the DNase I enzyme was damaged due to shearing forces exerted  
255 during the filling [38]. Therefore, it was decided to fill the channels first with buffer as above  
256 (20 Torr for 40 minutes) and then to add enzyme solution to the reservoir and allow penetration  
257 into the channels by diffusion (at 40°C for 90 minutes) through the liquid. The resulted in  
258 effective cutting of the DNA to a distance of  $1.1 \pm 0.2$ mm from the inlet (Fig 7).

259

260 **Fig 7. Fluorescence image of fragmented DNA remaining after digestion by DNase I**  
261 **diffusing through microfluidic channels.**

262 Distance from reservoir inlet is 1.1mm.

263

264

265 Following this modest improvement, we tried a series of similar experiments, lengthening the  
266 time of the heating/diffusion step up to 5 hours at 40°C. Experiments for times of 1.5, 2, 3, 4 and

267 5 hours all showed cutting up to a distance of approximately 1mm. A set of experiments varying  
268 the concentration of DNase I was tried next, with concentrations of 0.195, 0.295, 0.395, 0.495  
269 and 0.595 U/ $\mu$ l used (vacuum fill of buffer as above, followed by 2 hour 40°C heating/diffusion  
270 step). No clear trend was discernible, though the best sample, for 0.495U/ $\mu$ l, had a cutting  
271 distance of 1.8mm.

272 At this point, it occurred to us that enzyme adsorption to the walls of the channels might be  
273 limiting the diffusion of the DNase I. Previous studies [39,40] have shown that proteins may be  
274 adsorbed to PDMS and also that bovine serum albumin (BSA) may be used to block protein  
275 adsorption [41]. Two experiments were conducted in which the vacuum filling of the channels  
276 with buffer was followed by a heating/diffusion step of 1 hour at 40°C with the reservoir filled  
277 with a solution containing both DNase I (at 0.096U/ $\mu$ l) and BSA (NEB B9000S) at 0.13mg/ml  
278 or 0.40mg/ml. The lower BSA concentration had little effect on the cutting distance. However,  
279 the higher concentration sample showed enzymatic cutting to a distance of 3.3mm.

280 Next, we decided to try to diffuse in the BSA separately from, and before, the cutting enzyme.  
281 In addition, due to the sometimes excessive bubbling of the liquid in the reservoir during vacuum  
282 filling (the boiling point of water at 20 Torr is 21.9°C, quite close to typical room temperature),  
283 the vacuum filling was done at 120 Torr for 40 minutes. The sample was also tilted at 45° to the  
284 horizontal to promote escape of gas bubbles from the channels. Following the vacuum filling,  
285 BSA was added to the reservoir to a concentration of 0.40mg/ml and left to incubate at 40°C for  
286 1 hour. (As a check on the diffusion rates of BSA, we ran tests using fluorescently-labeled FITC-  
287 BSA (ThermoFisher Scientific, Waltham, MA), see Fig 8.) Afterwards, DNase I was added to  
288 0.095U/ $\mu$ l in the reservoir and incubated for 2 hours. With these changes, the effective cutting  
289 distance was increased to 5.0 $\pm$ 0.4mm.

290

291 **Fig 8. Measured diffusion distance of FITC-labeled BSA through micorfluidic channels**  
292 **versus diffusion time.**

293

294

295 Further optimization was obtained by using the same steps but varying the BSA concentration

296 up to 1.07 mg/ml, varying BSA incubation time up to 3 hours and DNase I incubation time also

297 up to 3 hours. This produced a significant improvement, with cutting distances of 10mm

298 consistently achieved. Fig 9 shows a sample with effective digestion for a sample with high

299 density of adsorbed DNA.

300

301 **Fig 9. DNA (at high density) fragmented on a surface by DNase I. Distance from inlet is**  
302 **8.7mm.**

303

304

305 Finally, an effort was made to shorten the times of the various steps, keeping the optimum

306 concentrations fixed. The following streamlined protocol was found:

307 (1) 15 minutes of vacuum filling of the channels at a pressure of 120 Torr. The reservoir was

308 filled with 150µl of DNase I Reaction Buffer.

309 (2) The sample was placed on a 40°C hotplate. 8µl of BSA stock was added to the reservoir,

310 making the BSA concentration 1.07mg/ml. The solution was mixed by careful up-and-down

311 pipetting.

312 (3) 60 minutes incubation with reservoir covered by parafilm to reduce evaporation.

313 (4) Addition of 7.5µl of DNase I stock to reservoir, making the concentration 0.09Units/µl.

314 Follow with mixing by careful up-and-down pipetting.

315 (5) 1 hour of incubation at 40°C with reservoir covered by parafilm.

316

## 317 **Conclusions**

318 We have demonstrated an effective and reproducible method for the fragmentation of surface-  
319 adsorbed and immobilized DNAs using soft lithography and microfluidic delivery of  
320 an anti-fouling coating (BSA) and the cutting enzyme (DNase I). This method also lends itself  
321 to ordered microfluidic removal of the fragments for sequencing applications or in-situ  
322 Next Generation Sequencing [33]. Removal of the fragments is complicated by the competing  
323 requirements of having relatively strong DNA-surface interactions, to enable immobilization on  
324 the surface, versus needing relatively weak interactions to allow desorption. One approach,  
325 which we are currently exploring, is to use a substrate which exhibits a reversible solubility  
326 switch from water-soluble to water-insoluble [42]. The immobilization is done in the water (and  
327 DNA-compatible buffer)-insoluble state while desorption is done into a water-based buffer  
328 which may be flowed through the channels. Alternatively, rather than use long microchannels, a  
329 PDMS stamp with holes used to create separate chambers could be used for fragmenting and  
330 amplifying/sequencing in-situ. Also, as noted above, steric hindrances can affect enzyme activity  
331 and the use of microporous substrates [43,44] can broaden the range of useable enzymes.

332

## 333 **Acknowledgments**

334 This research used resources of the Center for Functional Nanomaterials, which is a U.S.  
335 DOE Office of Science Facility, at Brookhaven National Laboratory under Contract No. DE-  
336 SC0012704. We thank Ke Zhu, Donald Liu, Alan Gan, Sara Goodwin and Adriana Pinkas-  
337 Sarafova for assistance with the experiments and for discussions.

338

## 339 **References**

340

341 1. Mardis, ER. Next-generation DNA sequencing methods. Annual Review  
342 of Genomics and Human Genetics. 2008; 9: 387-402.

343

344 2. Goodwin, S, McPherson, JD, McCombie, WR. Coming of age: ten years of  
345 Next-Generation Sequencing Technologies. Nature Reviews Genetics. 2016; 17: 333-  
346 351.

347

348 3. Giani, AM, Gallo, GR, Gianfranceschi, L, Formenti, G. Long walk to  
349 genomics: History and current approaches to genome sequencing and assembly.  
350 Computational and Structural Biotechnology Journal. 2020; 18: 9–19.

351

352 4. Hannan, AJ. Tandem repeats mediating genetic plasticity in health and disease. Nature  
353 Review Genetics. 2018; 19(5): 286-298.

354 5. Kitzman, JO, Mackenzie, AP, Adey, A, Hiatt, JB, Patwardhan, RP, Sudmant,  
355 PH, et al. Haplotype-resolved genome sequencing of a Gujarati Indian  
356 individual. Nature Biotechnology. 2011; 29: 59-63.

357

358 6. Peters, BA, Kermani, BG, Sparks, AB, Alferov, O, Hong, P, Alexeev, A,  
359 et al. Accurate whole-genome sequencing and haplotyping from 10 to  
360 20 human cells. Nature. 2012; 487: 190–195.

361

362 7. Amini, S, Pushkarev, D, Christiansen, L, Kostem, E, Royce, T, et al. Haplotype-  
363 resolved whole-genome sequencing by contiguity-preserving transposition and combinatorial  
364 indexing. Nature Genetics. 2014; 46: 1343-1349.

365

366 8. Zheng, GX, Lau, BT, Schnall-Levin, M, Jarosz, M, Bell, JM, et al. Haplotyping  
367 germline and cancer genomes with high-throughput linked-read sequencing. Nature  
368 Biotechnology. 2016; 34: 303-311.

369

370 9. Bruinsma, S, Burgess, J, Schlingman, D, et al. Bead-linked transposomes enable a  
371 normalization-free workflow for NGS library preparation. BMC Genomics. 2018; 19: Article  
372 722.

373

374 10. Chen, H, Yao, J, Fu, Y, Pang, Y, Wang, J, Huang, Y. Tagmentation on microbeads:  
375 restore long-range DNA sequence information using Next Generation Sequencing with  
376 library prepared by surface-immobilized transposomes. ACS Applied Materials and  
377 Interfaces. 2018; 10: 11539-11545.

378

379 11. Eid, J, Fehr, A, Gray, J, Luong, K, Lyle, J, et al. Real-time DNA sequencing from single  
380 polymerase molecules. Science. 2009; 323(5910): 133-138.

381

382 12. Deamer, D, Akeson, M, Branton, D. Three decades of nanopore sequencing. Nature  
383 Biotechnology. 2016; 34: 518–524.

- 384  
385 13. Gordon, D, Huddleston, J, Chaisson, MJ, Hill, CM, Kronenberg, ZN, Munson, KM,  
386 Malig, M, Raja, A, Fiddes, I, Hillier, LW, Dunn, C, Baker, C, Armstrong, J, Diekhans,  
387 M, Paten, B, Shendure, J, Wilson, RK, Haussler, D, Chin, CS, Eichler, EE. Long-  
388 read sequence assembly of the gorilla genome. *Science*. 2016; 352(6281): aae0344-1 to -7.  
389
- 390 14. Mantere, T, Kersten, S, Hoischen, A. Long-read sequencing emerging in medical  
391 genetics. *Frontiers in Genetics*. 2019; 10: Article 426.  
392
- 393 15. Shafin, K, Pesout, T, Lorig-Roach, R, et al. Nanopore sequencing and the Shasta toolkit  
394 enable efficient de novo assembly of eleven human genomes. *Nature Biotechnology*. 2020;  
395 <https://doi.org/10.1038/s41587-020-0503-6>.  
396
- 397 16. Amarasinghe, SL, Su, S, Dong, X, Zappia, L, Ritchie, ME, Gouil, Q. Opportunities  
398 and challenges in long-read sequencing data analysis. *Genome Biology*. 2020; 21(1): 1-16.  
399
- 400 17. Knierim, E, Luckel, B, Schwarzl, J. M, Schuelke, M, Seelow, D. Systematic  
401 comparison of three methods for fragmentation of long-range PCR products for Next  
402 Generation Sequencing. *PloS ONE*. 2011; 6(11): e28240.  
403
- 404 18. Poptsova, M, Il'icheva, I, Nechipurenko, D, et al. Non-random DNA fragmentation in next-  
405 generation sequencing. *Science Reports*. 2015; 4: 4532 <https://doi.org/10.1038/srep04532>.  
406
- 407 19. Kurosawa, O, Okabe, K, Washizu, M. DNA analysis based on physical manipulation  
408 Proceedings of the 13th Annual International Conference on Micro Electro  
409 Mechanical Systems (MEMS 2000) pp. 311-316.  
410
- 411 20. Yamamoto, T, Kurosawa, O, Kabata, H, Shimamoto, N, Washizu, M. Molecular surgery  
412 of DNA based on electrostatic micromanipulation. *IEEE Transactions on Industry  
413 Applications*. 2000; 36(4): 1010-107.  
414
- 415 21. Kurosawa, O, Washizu, M. Dissection, acquisition and amplification of targeted position  
416 of electrostatically stretched DNA. *Journal of Electrostatics*. 2007; 65: 423–430.  
417
- 418 22. Mizuno, A, Katsura, S. DNA immobilized on glass, localized Mg ions activated EcoRI  
419 restriction enzyme manipulation of a large DNA molecule using the phase  
420 transition. *Journal of Biological Physics*. 2002; 28: 587–603.  
421
- 422 23. Cho, N, Goodwin, S, Budassi, J, Zhu, K, McCombie, WR, Sokolov, J. Fragmentation of  
423 surface adsorbed and aligned DNA molecules using soft lithography for Next-Generation  
424 Sequencing. *Journal of Biosensors & Bioelectronics*. 2017; 8(3): DOI: 10.4172/2155-  
425 6210.1000247.  
426
- 427 24. Bensimon, A, Simon, A, Chiffaudel, A, Croquette, V, Heslot, F, Bensimon, D.  
428 Alignment and sensitive detection of DNA by a moving interface. *Science*. 1994;  
429 265(5181): 2096-8.

- 430  
431 25. Bensimon, D, Simon, AJ, Croquette, V, Bensimon, A. Stretching DNA with a  
432 receding meniscus: experiments and models. *Physical Review Letters*. 1995;  
433 74(23): 4754-4757.  
434  
435 26. Michalet, X, Ekong, R, Fougerousse, F, Rousseaux, S, Schurra, C, Hornigold, N,  
436 van Slegtenhorst, M, Wolfe, J, Povey, S, Beckmann, JS, Bensimon, A. Dynamic  
437 molecular combing: stretching the whole human genome for high-resolution  
438 studies. *Science*. 1997; 277(5331): 1518-1523.  
439  
440 27. Schwartz, DC, Li, X, Hernandez, LI, Ramnarain, SP, Huff, EJ, Wang, Y-K. Ordered  
441 restriction maps of *Saccharomyces cerevisiae* chromosomes constructed by optical  
442 mapping. *Science*. 1993; 262(5130); 110-114.  
443  
444 28. Kaykov A, Taillefumier T, Bensimon A, Nurse P. Molecular combing of single  
445 DNA molecules on the 10 megabase scale. *Scientific Reports*. 2016; 6:19636:  
446 DOI:10.1038/srep19636.  
447  
448 29. Allemand, JF, Bensimon, D, Jullien, L, Bensimon, A, Croquette, V. pH-dependent  
449 specific binding and combing of DNA. *Biophysical Journal*. 1997; 73: 2064-2070.  
450  
451 30. Benke, A, Mertig, M, Pompe, W. Ph- and salt-dependent molecular combing of DNA:  
452 experiments and phenomenological model. *Nanotechnology*. 2010; 22(3): doi: 10.1088/0957-  
453 4484/22/3/035304.  
454  
455 31. Xia, Y, Whitesides, GM. Soft lithography. *Angewandte Chemie International*  
456 *Edition*. 1998; 37: 550-575.  
457  
458 32. Schwartz, J, Lee, C, Hiatt, JB, et al. Capturing native long-range contiguity by in-situ  
459 library construction and optical sequencing. *Proceedings of the National Academy of*  
460 *Science*. 2012; 109(46): 18749-18754.  
461  
462 33. Feng, K, Costa, J, Edwards, JS. Next-generation sequencing library construction on a  
463 surface. *BMC Genomics*. 2018; 19:416: <https://doi/10.1186/s12864-018-4794-4>.  
464  
465 34. Okumura, H, Akane, T, Tsubo, Y, Matsumoto, S. Comparison of  
466 conventional surface cleaning methods for Si molecular beam epitaxy. *Journal*  
467 *of the Electrochemical Society*. 1997; 144: 3765-3768.  
468  
469 35. Whitesides, GM, Ostuni, E, Takayama, S, Jiang, X, Ingber, DE. Soft lithography  
470 in biology and biochemistry. *Annual Review of Biomedical Engineering*. 2001; 3: 335-  
471 373.  
472  
473 36. Gueroui, Z, Place, C, Freyssingeas, E, Berge, B. Observation by fluorescence microscopy  
474 of transcription on single combed DNA. *Proceedings of the National Academy of*



- 475 Sciences. 2002; 99(9): 6005-6010.  
476
- 477 37. Monahan, J, Gewirth, AA, Nuzzo, RA. Method for filling complex polymeric  
478 microfluidic devices and arrays. *Analytical Chemistry*. 2001; 73(13): 3193–3197.  
479
- 480 38. Clarkson, JR, Cui, ZF, Darton, RC. Protein denaturation in foam. *Journal of Colloid*  
481 *and Interface Science*. 1999; 215(2): 333-338.  
482
- 483 39. James, CD, Davis, RC. Kam, L, Craighead, HG, Isaacson, M, Turner, JN, Shain,  
484 W. Patterned protein layers on solid substrates by thin stamp microcontact printing.  
485 *Langmuir*. 1998; 14(4): 741-744.  
486
- 487 40. Bernard, A, Delamarche, E, Schmid, H, Michel, B, Bosshard, HR, Biebuyck, H.  
488 Printing patterns of proteins. *Langmuir*. 1998; 14(9): 2225-2229.  
489
- 490 41. Ostuni, E, Chen, CS, Ingber, DE, Whitesides, GM. Selective deposition  
491 of proteins and cells in arrays of microwells. *Langmuir*. 2001; 17: 2828-2834.  
492
- 493 42. Linder, V, Gates, BD, Ryan, D, Parviz, BA, Whitesides, GM. Water-soluble  
494 sacrificial layers for surface micromachining. *Small*. 2005; 1(7): 730-736.  
495
- 496 43. Fuke A, Suzuki, T, Nakama, K, Kabata, H, Kotera, H. High-throughput gene analysis  
497 using suspending DNA fibers (SDFs) on a micro glass-phonorecord. Twelfth International  
498 Conference on Miniaturized Systems for Chemistry and Life Sciences. October 12 - 16,  
499 2008; San Diego, California, USA, 1519-1521.  
500
- 501 44. Trigo-Lopez, M, Vallejos, S, Reglero Ruiz, JA, Ramos, C, Beltran, S, García, FC,  
502 García, JM. Fabrication of microporous PMMA using ionic liquids: An improved route to  
503 classical ScCO<sub>2</sub> foaming process. *Polymer*. 2019; 183: 121867.

# PDMS Soft Lithography Grating

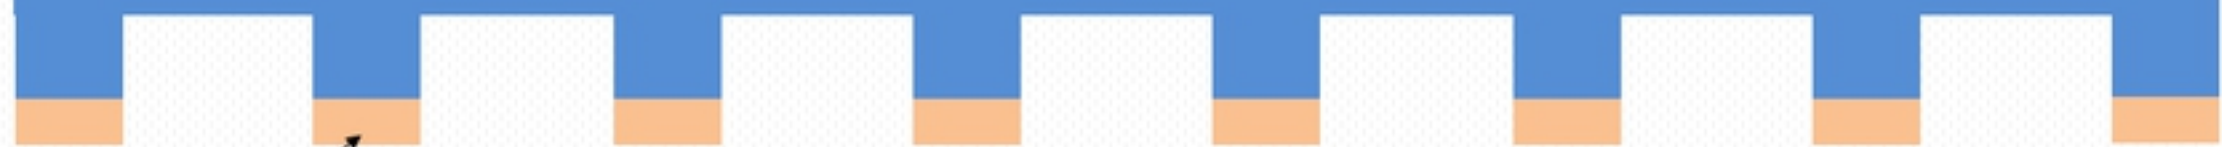

Enzyme

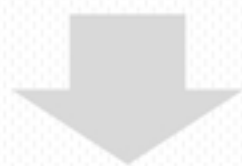

DNA

Substrate

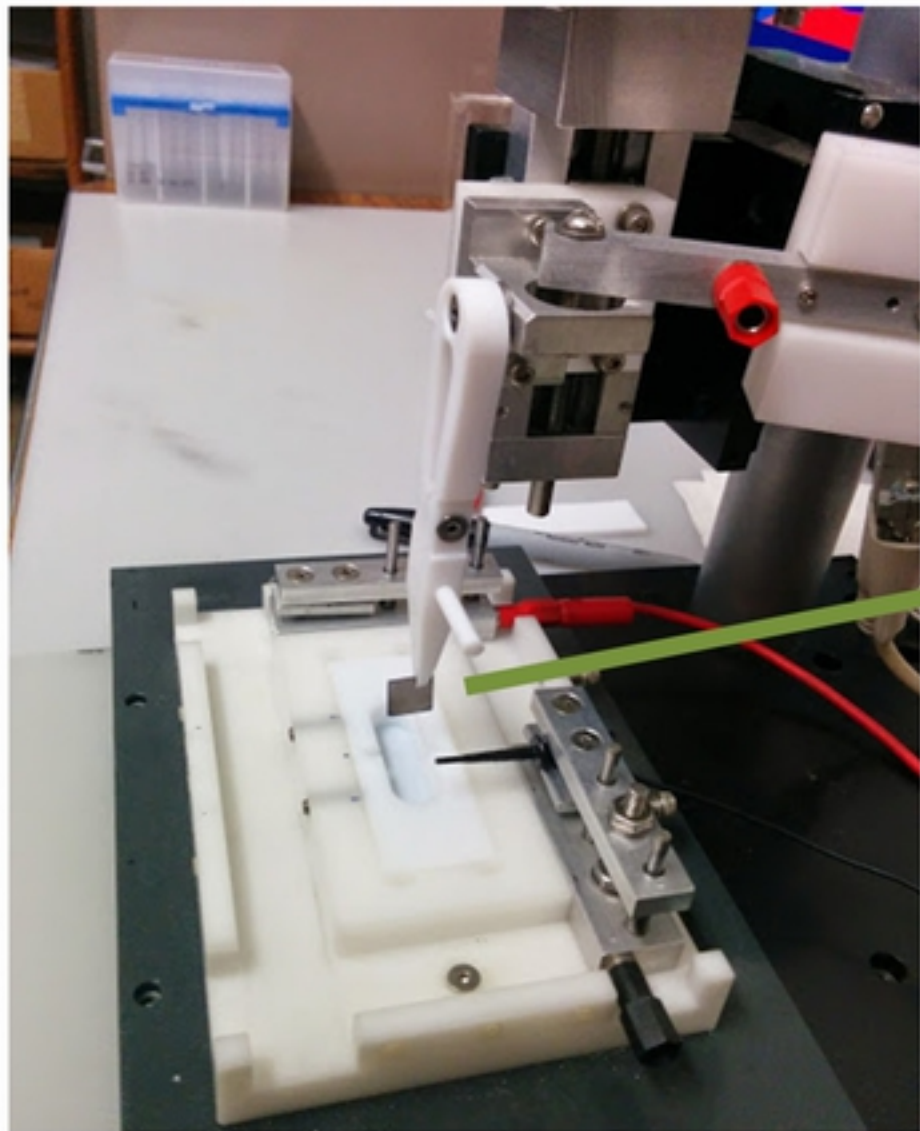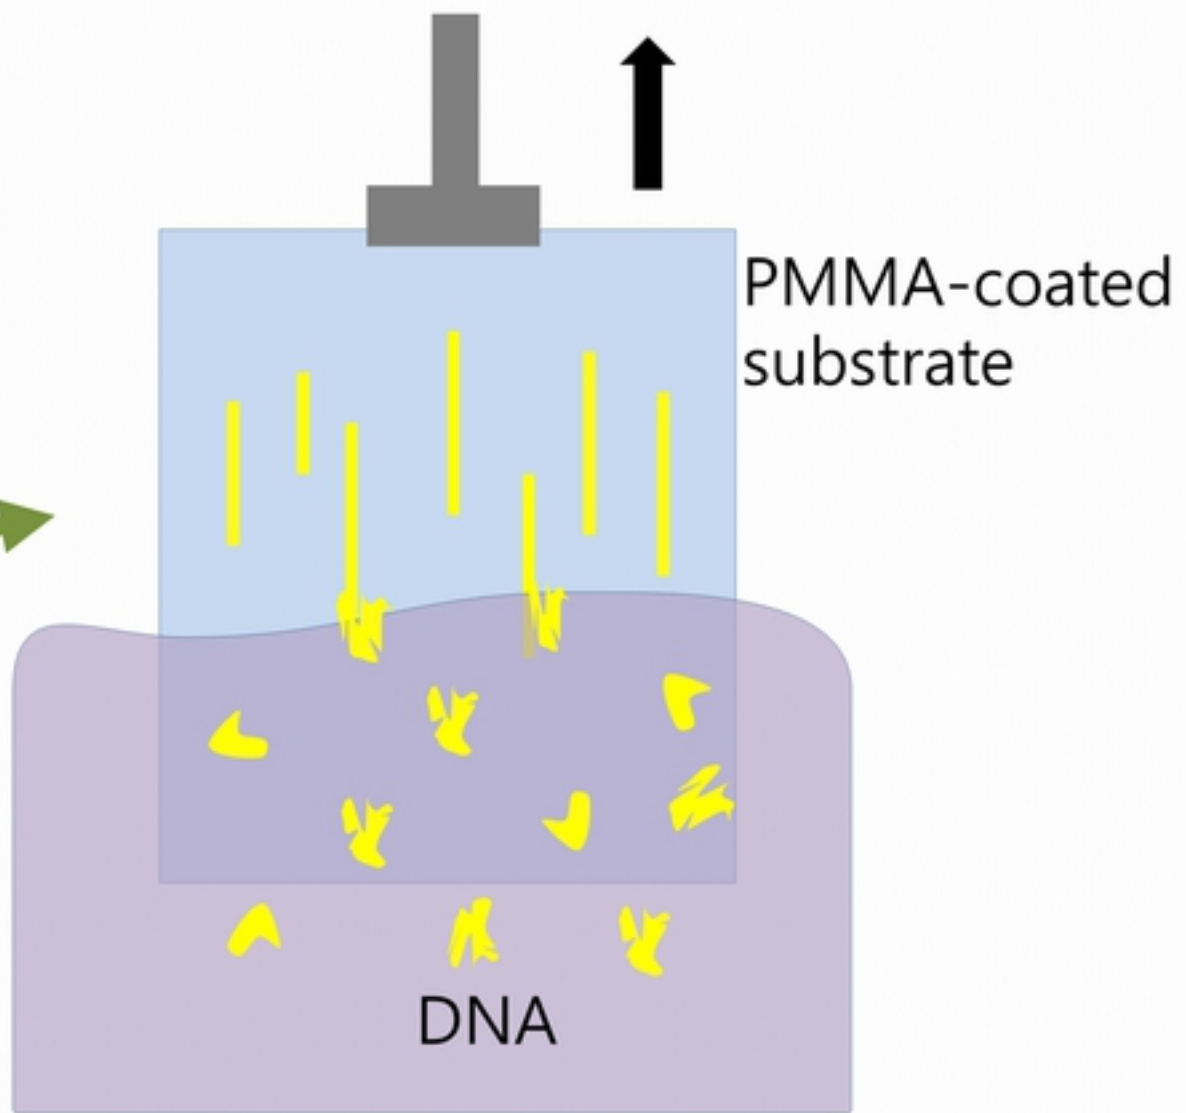

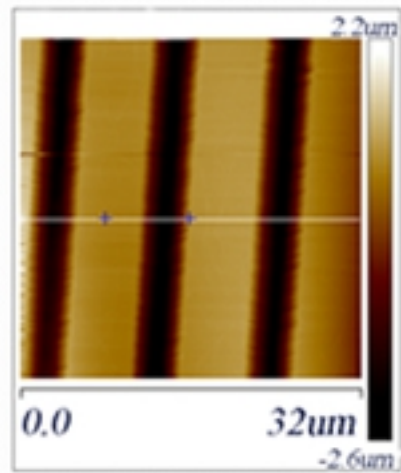

A

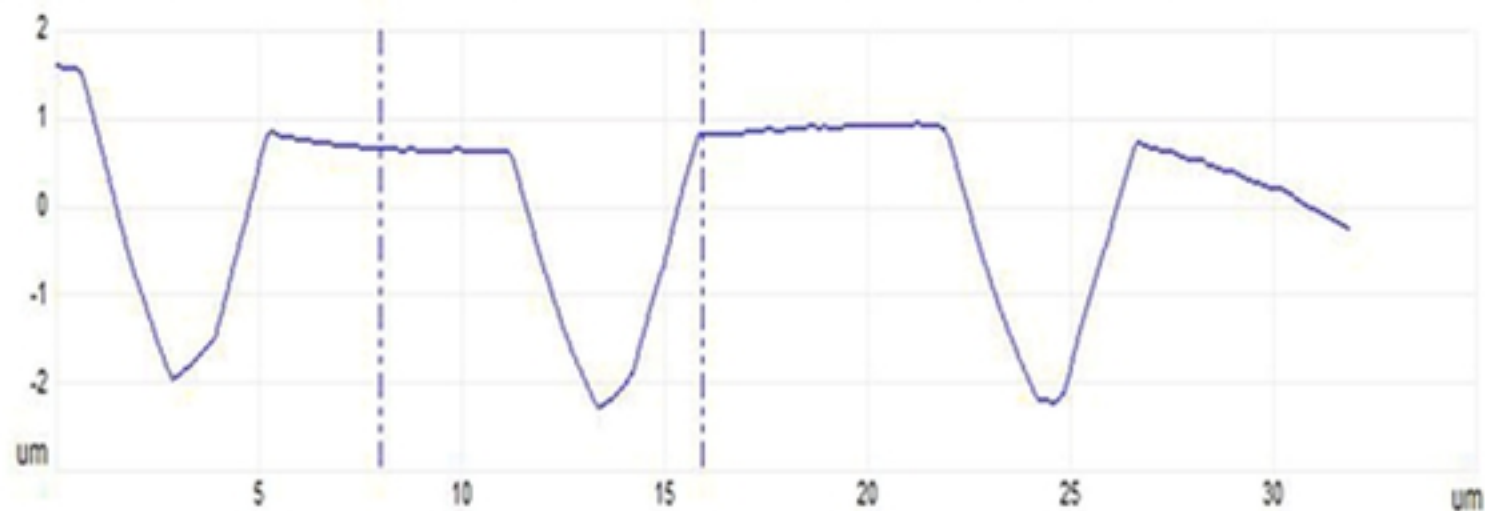

B

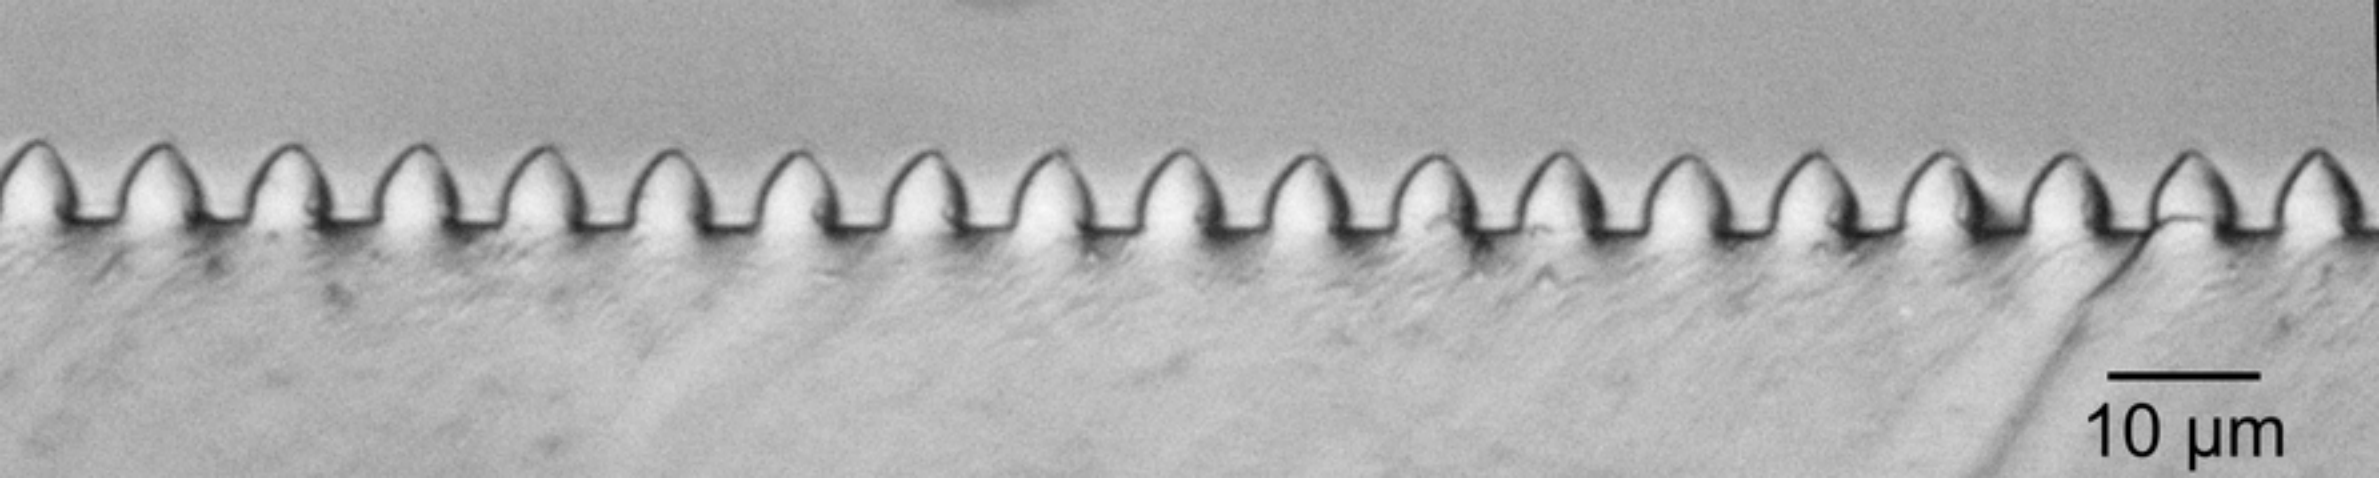

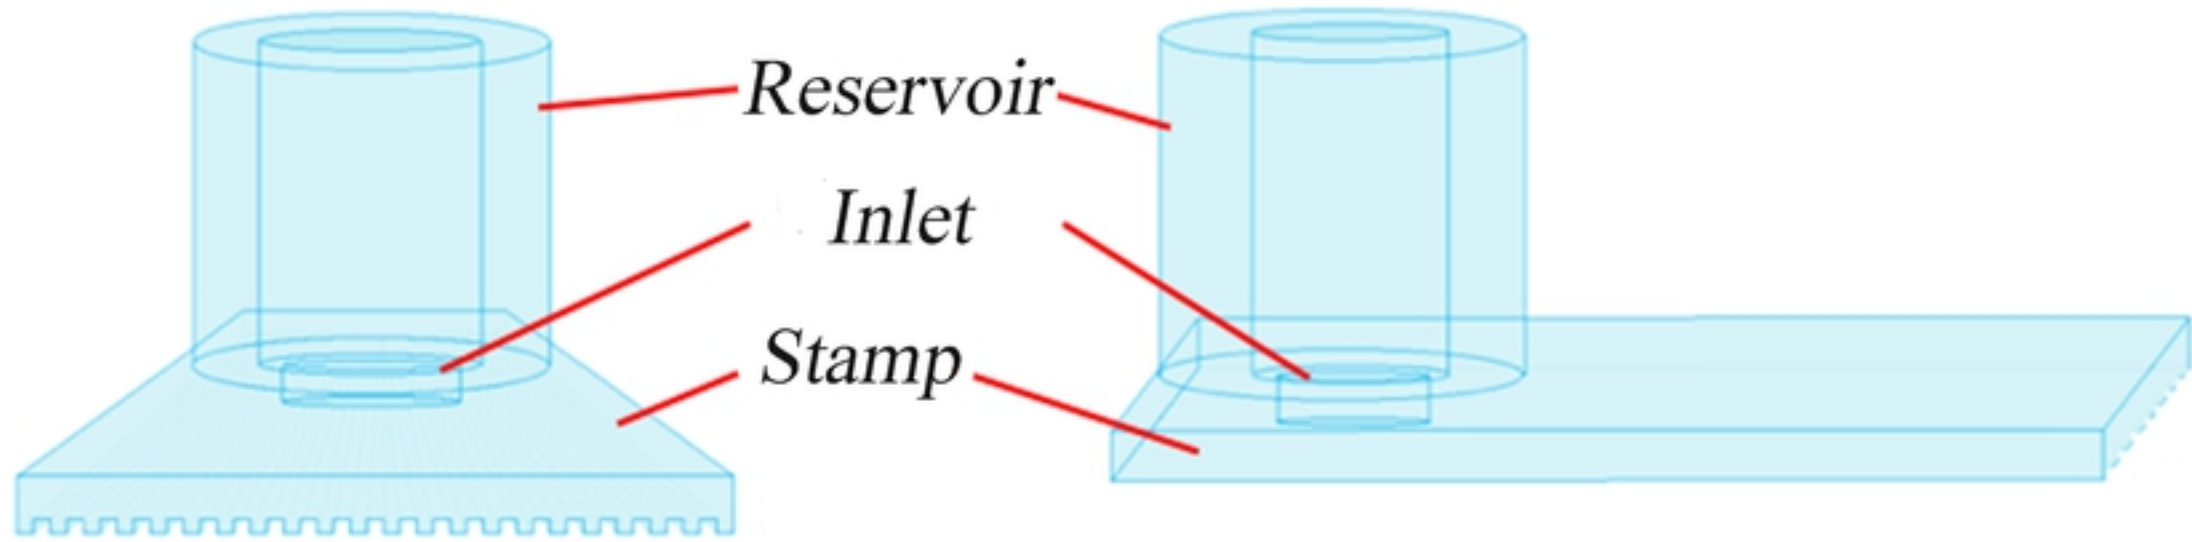

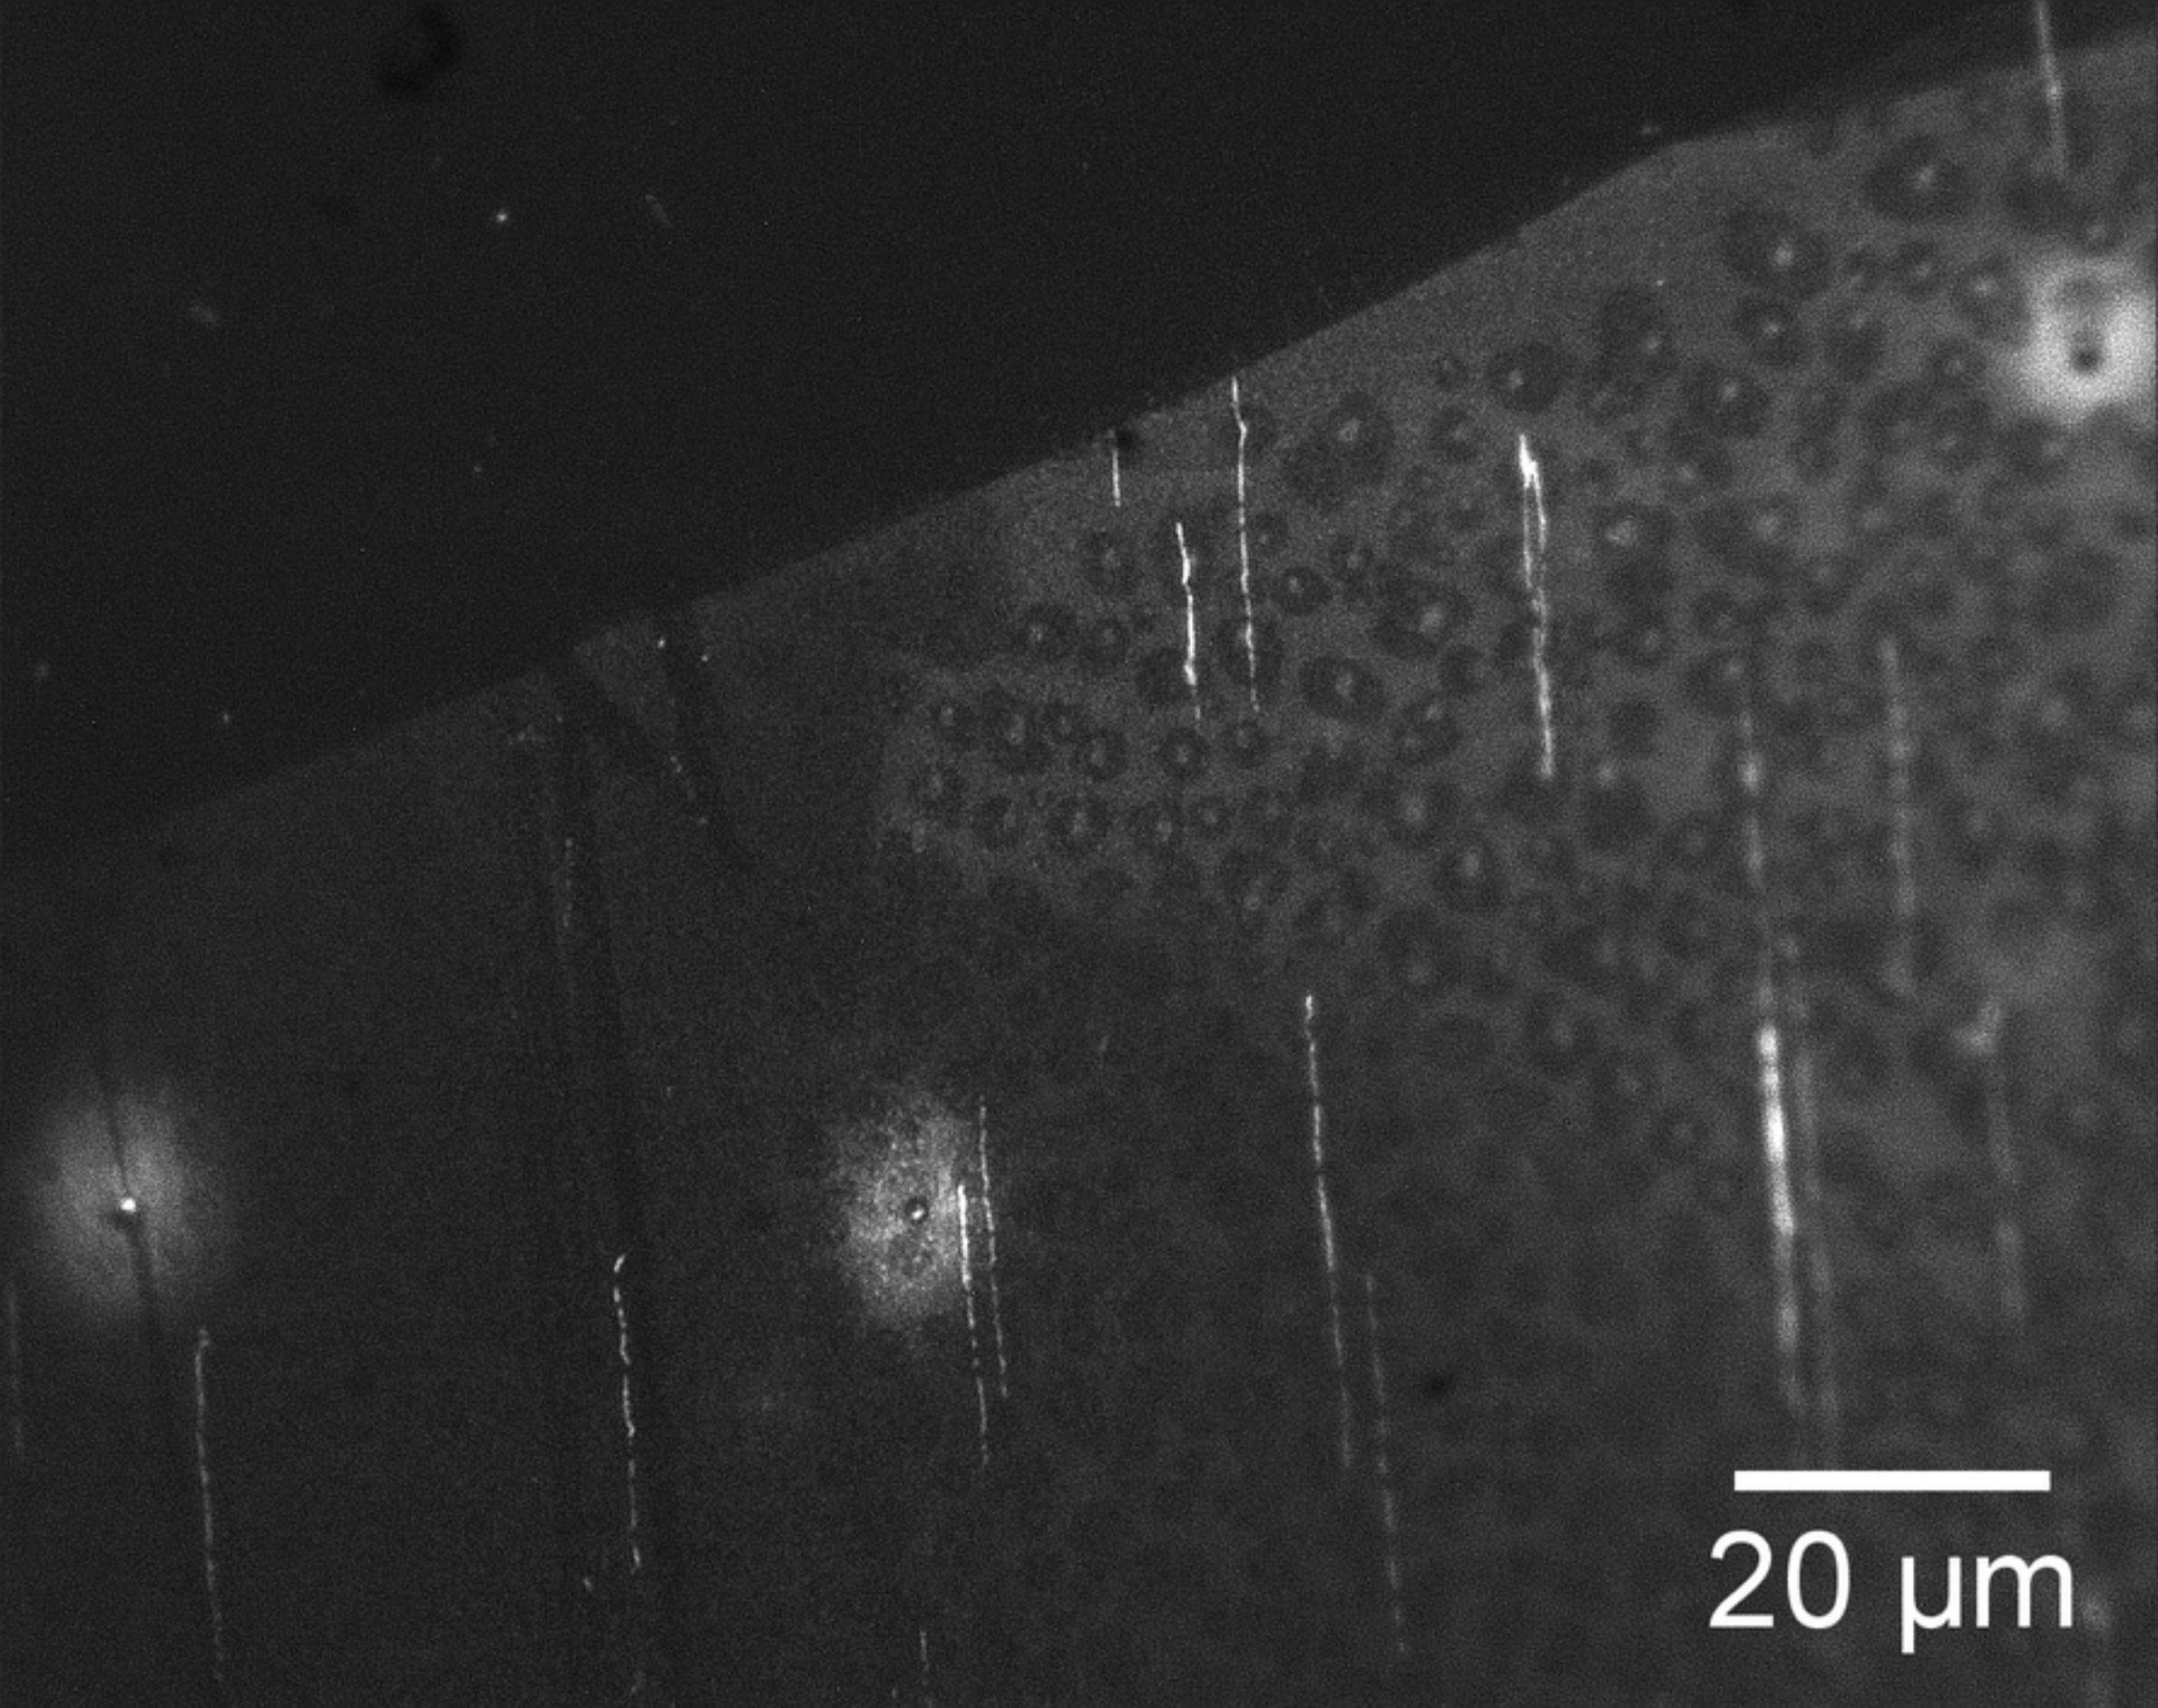

20 μm

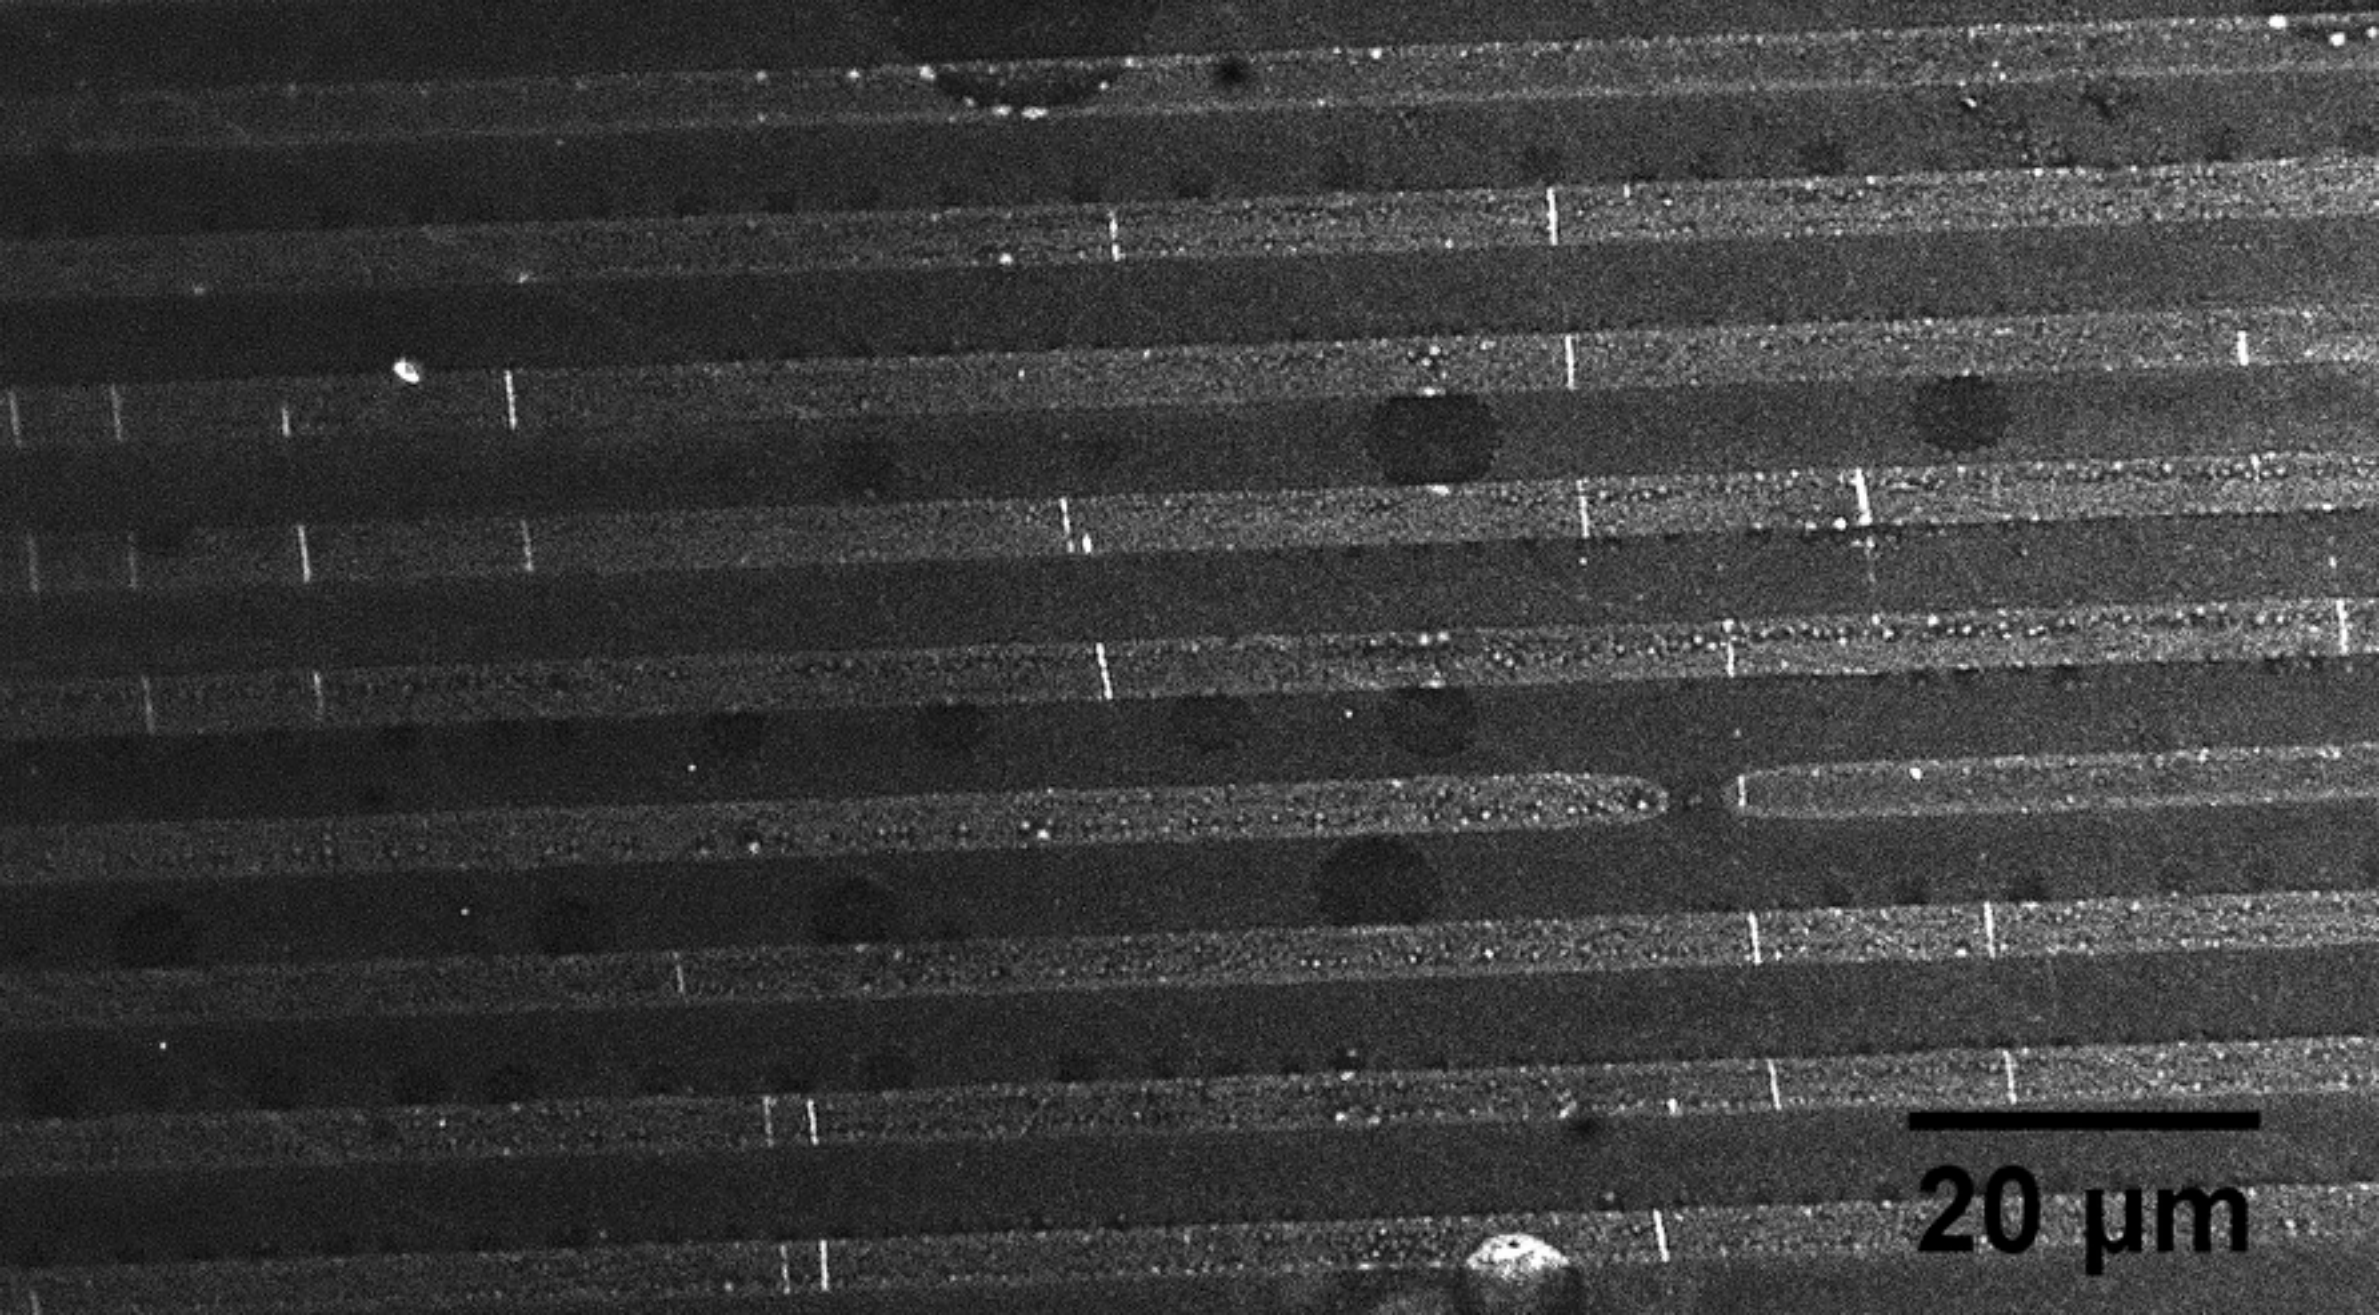

20  $\mu\text{m}$



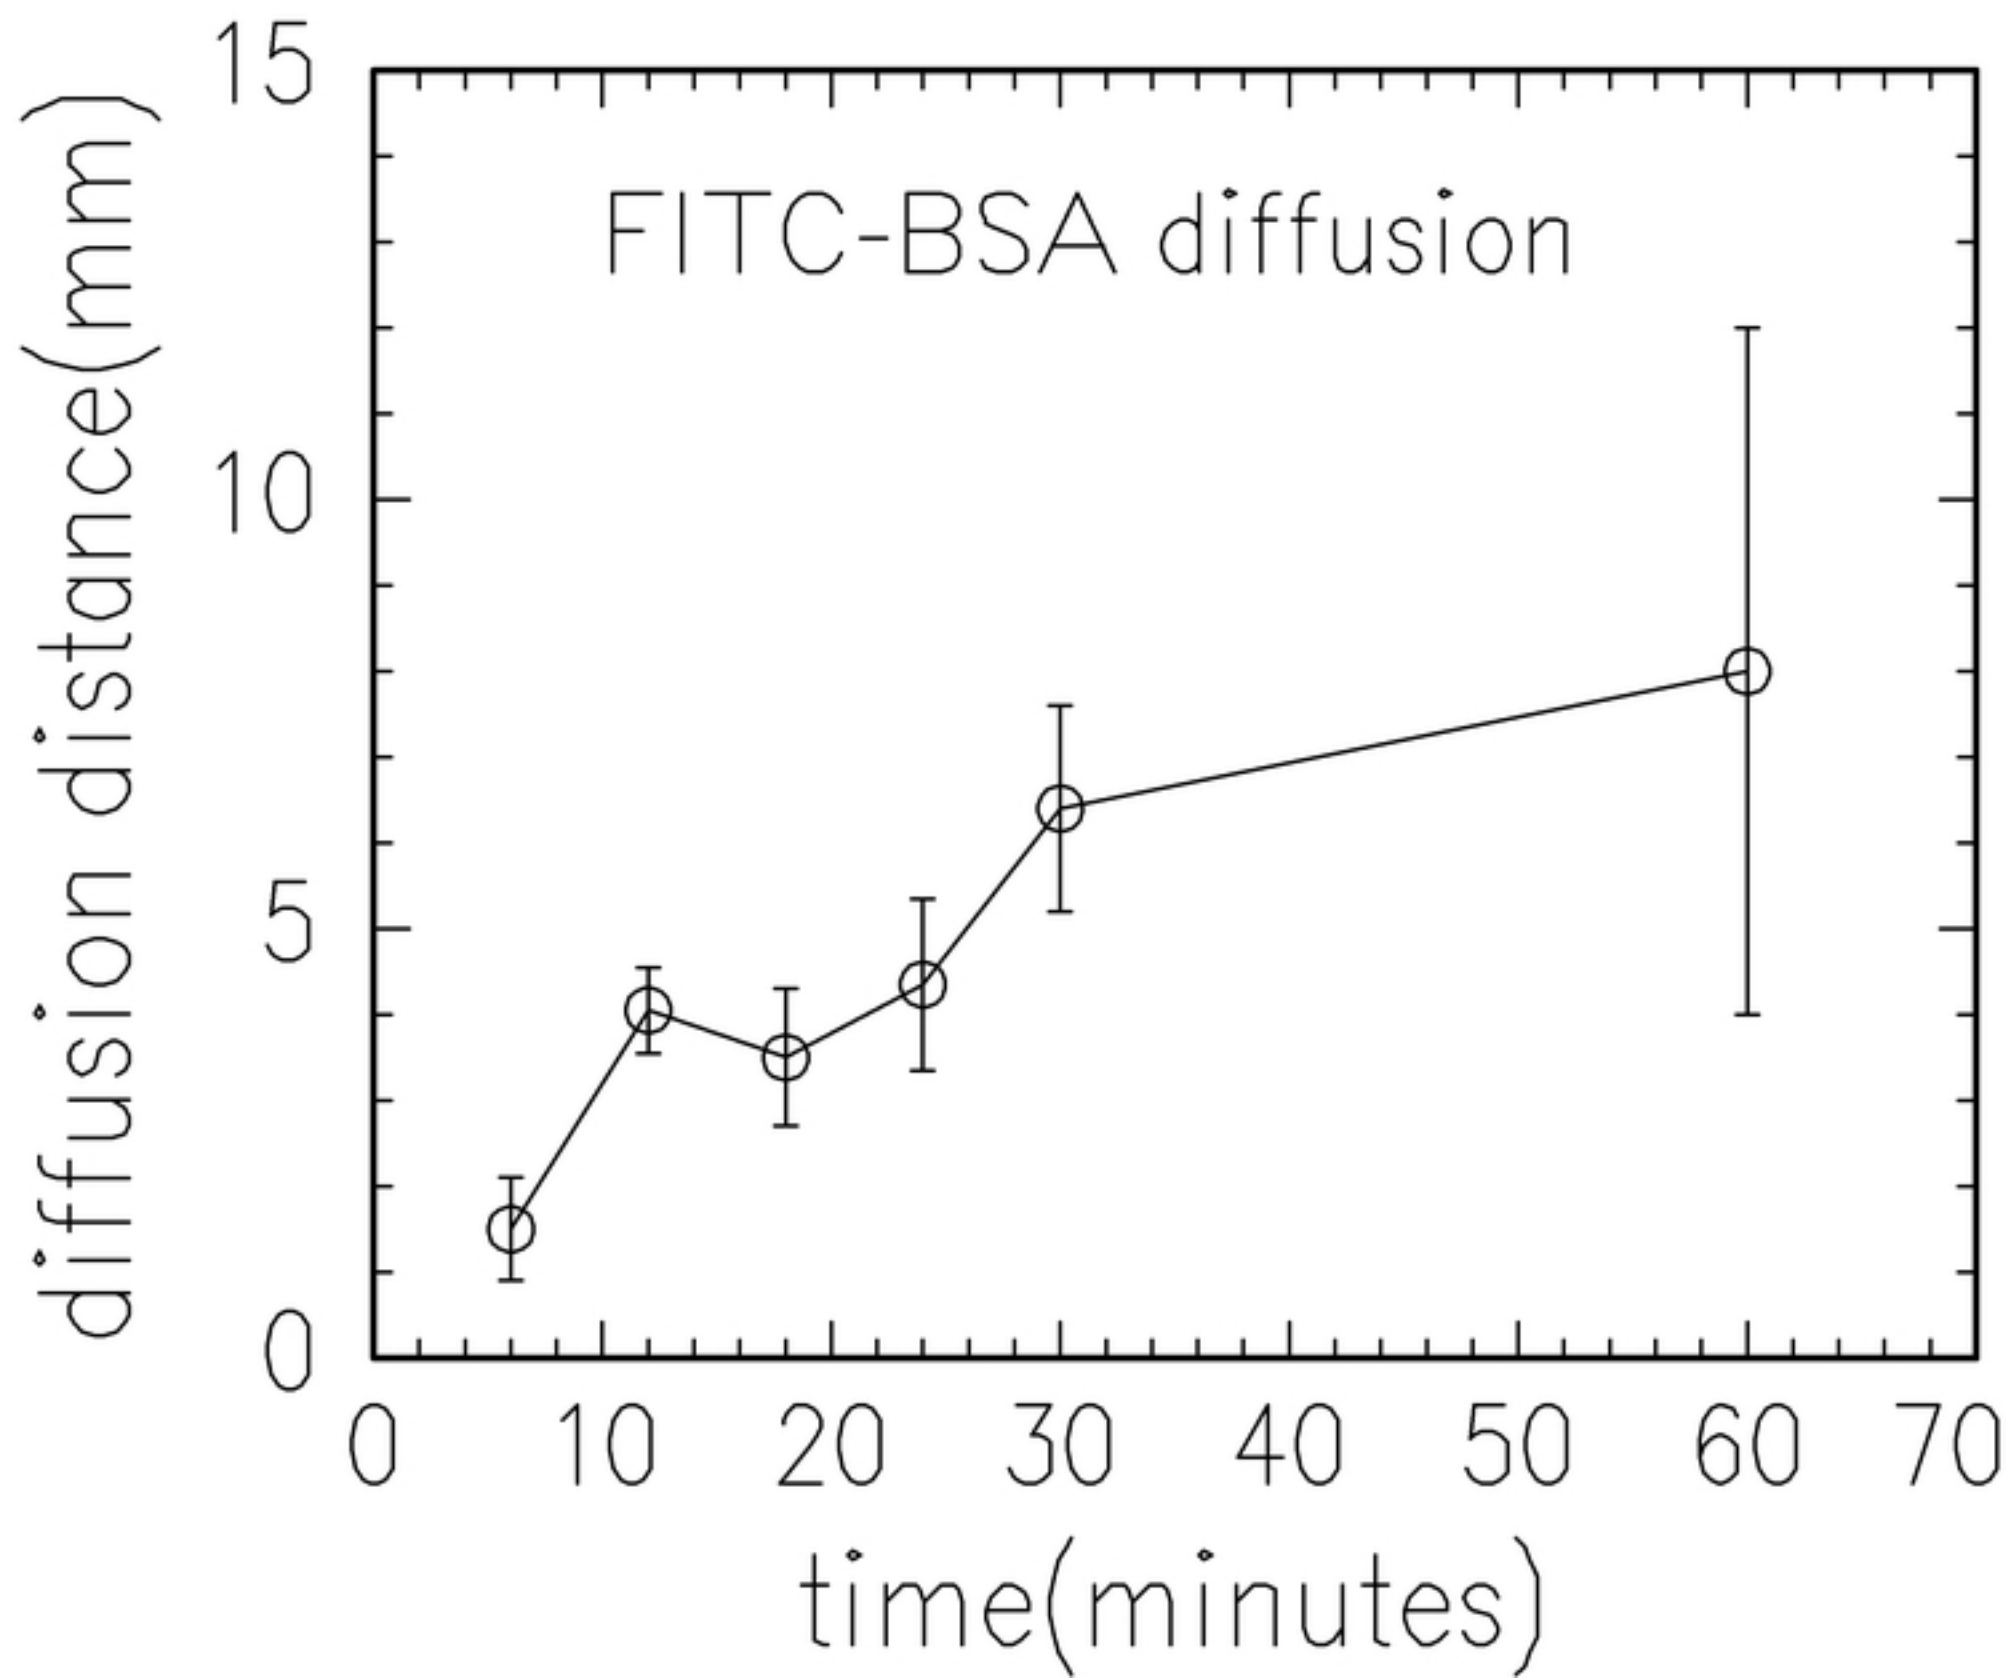

A grayscale micrograph showing a textured surface. The surface has a complex, porous, and interconnected structure, possibly a biological or synthetic material. The texture consists of many small, irregular features and voids. In the bottom right corner, there is a white horizontal scale bar with the text "20 μm" written below it.

20  $\mu\text{m}$
